# Supplementary material
Source: PubMed Central journal article supplement (PMC5126294)
Supplement: MCB.00450-16_zmb999101372so1.pdf [file MCB.00450-16_zmb999101372so1.pdf]

## Supplemental figure S1

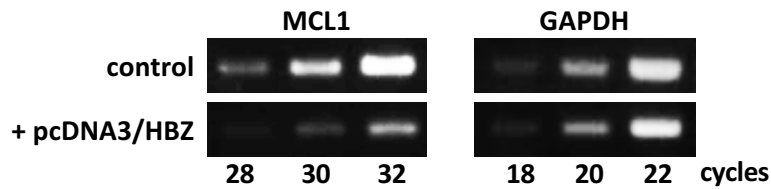

### Supplemental Figure S1. The effect of HBZ on mRNA expression levels of MCL1.

HEK-293T cells were transfected with 6  $\mu$ g of plasmid expressing HBZ (bottom panels) or empty plasmid (top panels). Total RNA was isolated from the cultured cells, and then cDNA was synthesized using the reverse transcription kit. Semi-quantitative PCR was performed on cDNA samples using specific primers against each MCL1 and GAPDH. GAPDH was used as a loading control.

## Supplemental figure S2

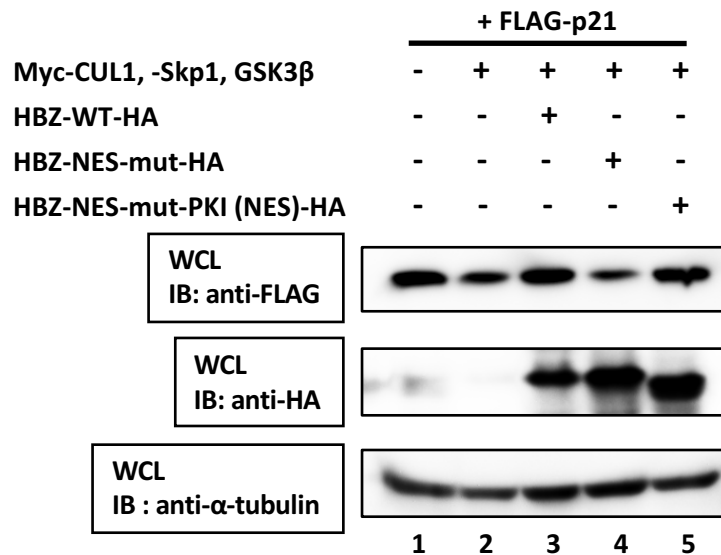

### Supplemental Figure S2. HBZ regulates the stabilization of p21 by suppressing the SCF E3 ligase activity.

HEK-293T cells were co-transfected with 0.5  $\mu$ g of plasmid expressing FLAG-p21 together with (+) or without (-) 1  $\mu$ g of plasmid expressing Myc-CUL1, -Skp1, -GSK3 $\beta$ , and 2.5  $\mu$ g of plasmid expressing HBZ-WT-HA, -NES-mutant (mut)-HA, or -NES-mut-PKI (NES)-mut-HA. The expression plasmid for p21 has been described previously (29). After 36 h, the cell lysates were then subjected to SDS-PAGE, followed by immunoblot with anti-FLAG, anti-HA, and anti- $\alpha$ -tubulin antibodies.
